# Supplementary material for: Diet or medication in primary care patients with IBS: the DOMINO study - a randomised trial supported by the Belgian Health Care Knowledge Centre (KCE Trials Programme) and the Rome Foundation Research Institute
Source: HighWire-hosted journal article supplement (doi:10.1136/gutjnl-2021-325821), 2022-04-28

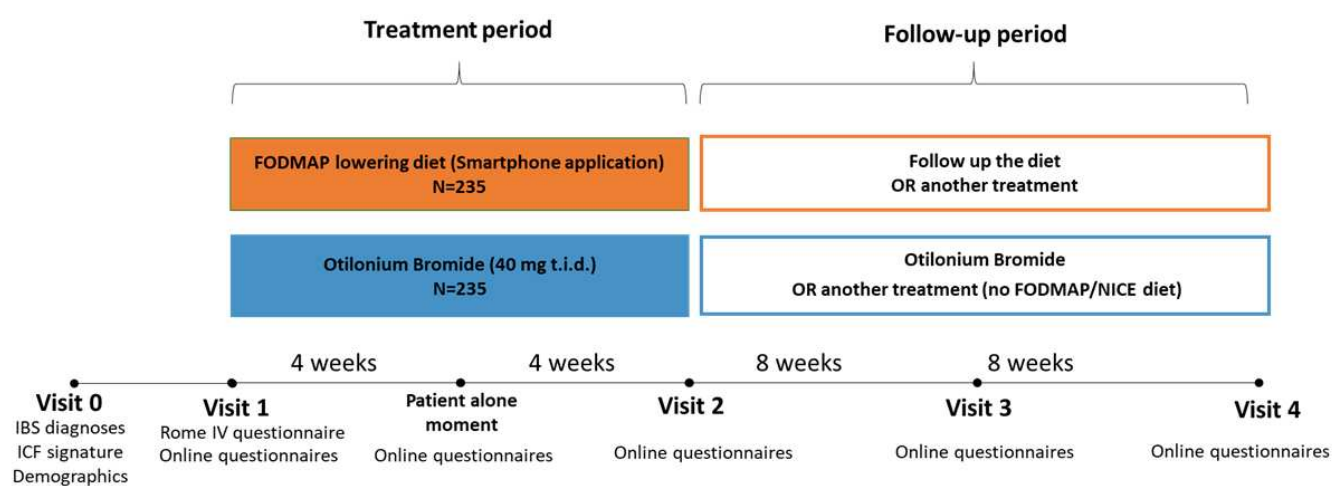

Supplement: gutjnl-2021-325821supp001_data_supplement.pdf [file gutjnl-2021-325821supp001_data_supplement.pdf]
