# Supplementary figures and images for: Diet or medication in primary care patients with IBS: the DOMINO study - a randomised trial supported by the Belgian Health Care Knowledge Centre (KCE Trials Programme) and the Rome Foundation Research Institute
Source: PubMed Central journal article supplement — Gut. 2022 Apr 28;71(11):2226–32. doi: 10.1136/gutjnl-2021-325821 (PMC9554021; doi:10.1136/gutjnl-2021-325821), 2022-04-28

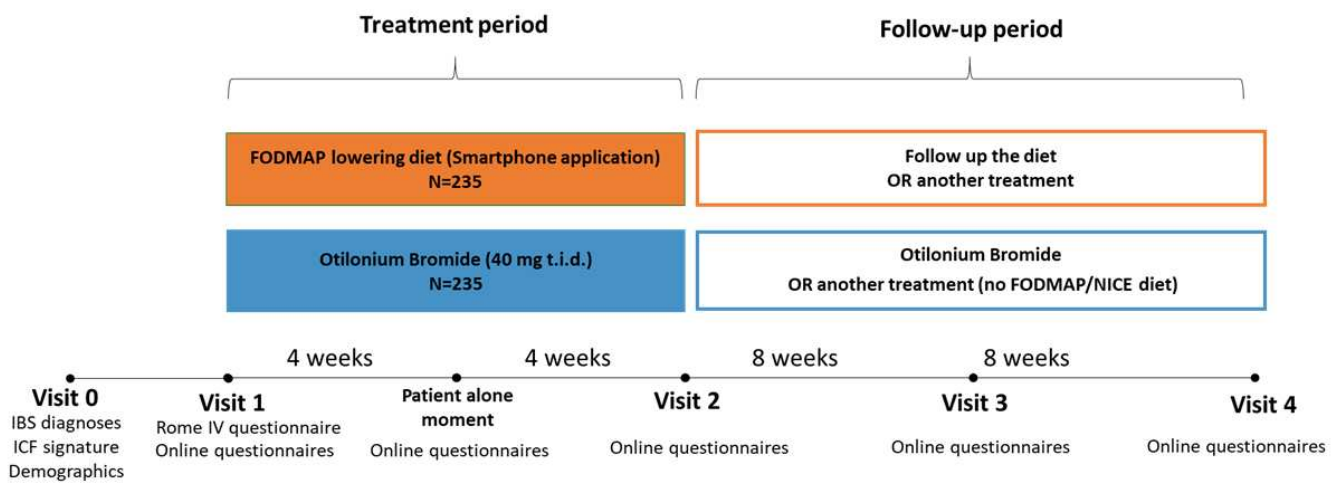

Supplement: gutjnl-2021-325821supp001.pdf [file gutjnl-2021-325821supp001.pdf]
